# Supplementary material for: Cholesterol Alters Mitophagy by Impairing Optineurin Recruitment and Lysosomal Clearance in Alzheimer’s Disease
Source: Research Square preprint supplement (doi:10.21203/rs.3.rs-69969/v2), 2020-12-29
Supplement: Supplementary file 1 [file c8f4bd34de303ae5d4a9d8df.docx]

**supplementary data**

**CHOLESTEROL ALTERS MITOPHAGY BY IMPAIRING OPTINEURIN RECRUITMENT AND LYSOSOMAL CLEARANCE IN ALZHEIMER’S DISEASE**

Vicente Roca-Agujetas1,3, Elisabet Barbero-Camps1, Cristina de Dios1,3,4, Petar Podlesniy1,2,3, Xenia Abadin1, Albert Morales1, Montserrat Marí1, Ramon Trullàs1,2,3, Anna Colell1, 3

1Department of Cell Death and Proliferation, and 2Neurobiology Unit, Institut d'Investigacions Biomèdiques de Barcelona (IIBB), Consejo Superior de Investigaciones Científicas (CSIC). Institut d'Investigacions Biomèdiques August Pi i Sunyer (IDIBAPS), Barcelona, Spain. 

3Centro de Investigación Biomédica en Red sobre Enfermedades Neurodegenerativas (CIBERNED), Spain.

4Departament de Biomedicina, Facultat de Medicina, Universitat de Barcelona, Barcelona, Spain.

**SUPPLEMENTARY FIGURES**

**
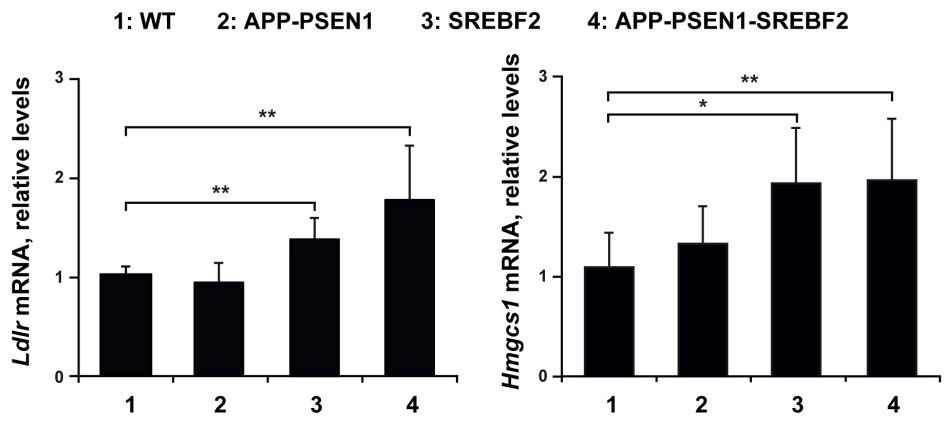
**

**Figure 1.** **Upregulated mRNA expression levels of cholesterol-related genes in hippocampus from mice that overexpress SREBF2.** mRNA levels of LDL receptor and HMG-CoA synthase in brains from WT (wild-type), SREBF2, APP-PSEN1, and APP-PSEN1-SREBF2 mice. Student’s t-test. **P* < 0.05, ***P* < 0.01 (data are mean ± SD).

**
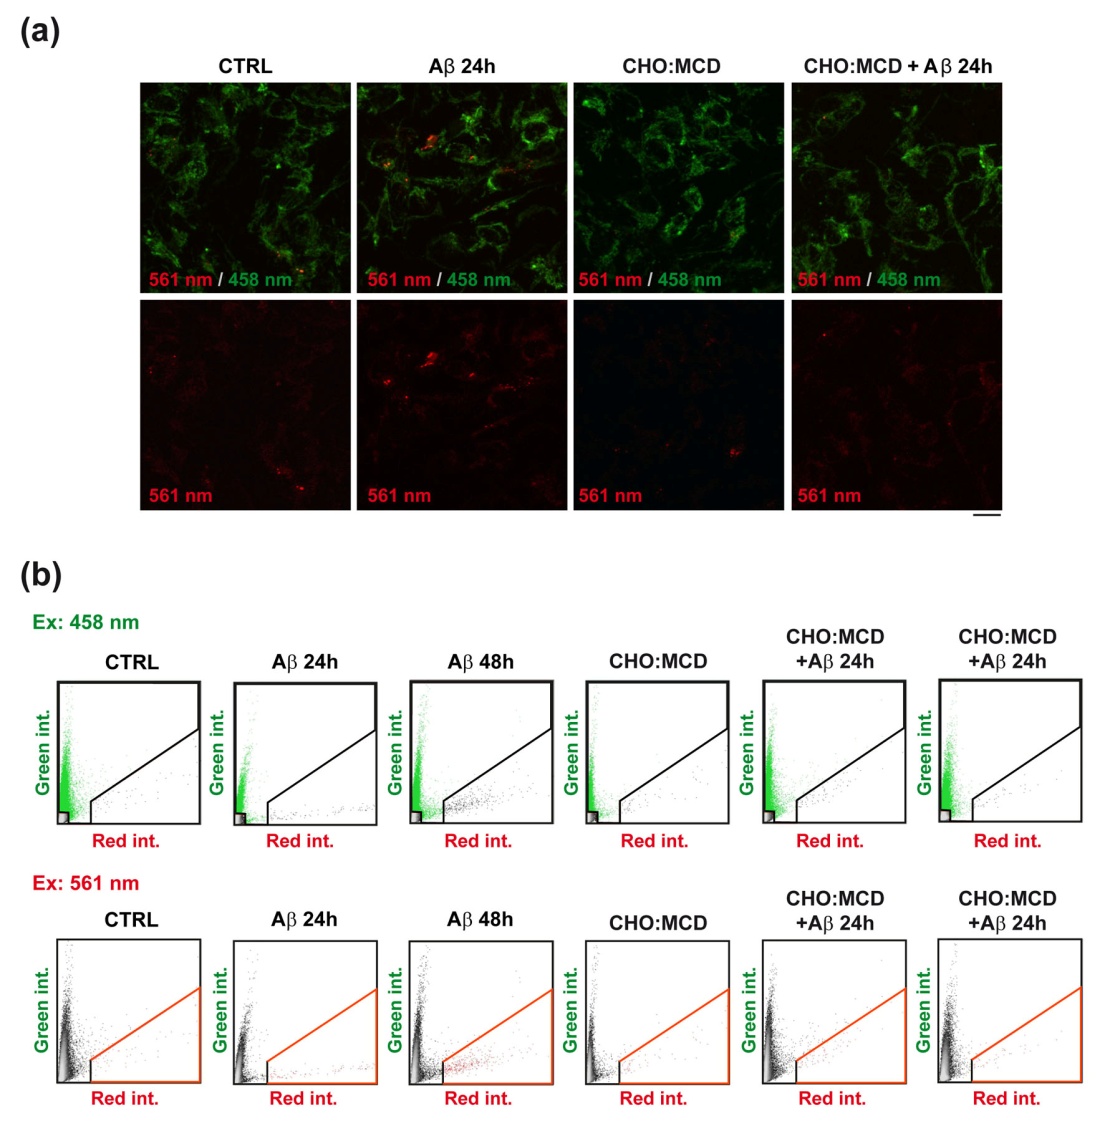
**

**Figure 2.** **Cholesterol enrichment in SH-SY5Y cells prevents mitochondrial lysosomal clearance after Aβ induction of mitophagy.** Cells were incubated with a complex of cholesterol:methyl-β-cyclodextrin (CHO:MCD) containing 50 μg/ml cholesterol for 1 h followed by 4h of recovery. Mitophagy was induced with Aβ (10 μM) for 24 h. **(a)** Dual-excitation ratiometric imaging of control and cholesterol-enriched cells stably expressing mt-mKeima after Aβ exposure. The emission signal obtained after excitation with the 458 nm laser is shown in green, and that obtained after excitation with the 561 nm laser is shown in red. Scale bars: 25 μm. **(b)** Intensity scatter plots. For each condition, all the pixels from the sum projection of green and red channels are represented. Selected red areas are the pixels with a ratio of red/green intensity higher than 1.5. Mitophagy index is calculated by dividing the pixels from the red area by the total sum of red and green selection, after subtracting the background.


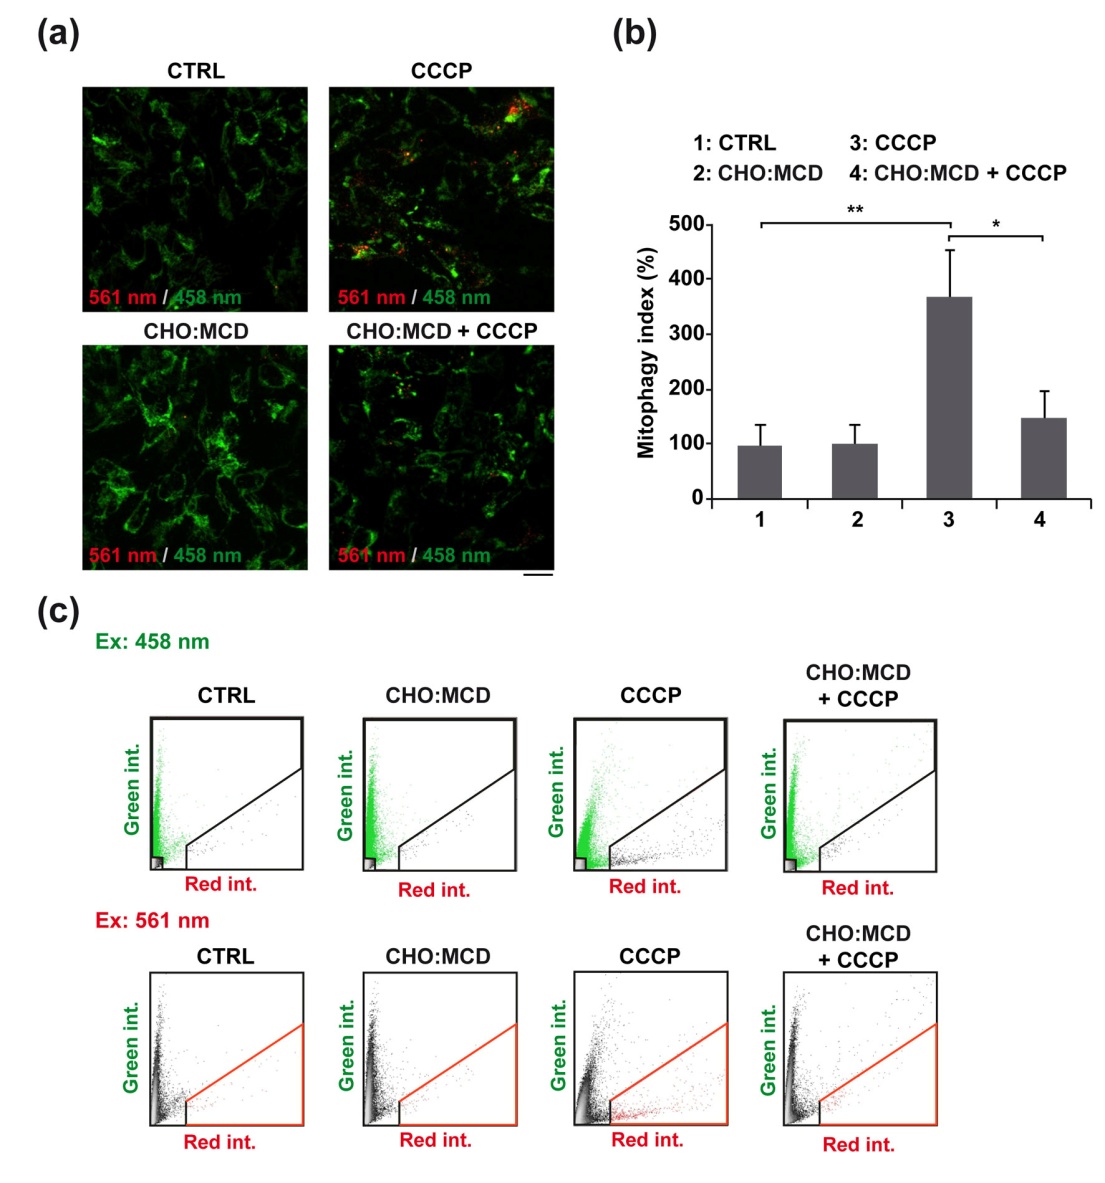


**Figure 3.** **Impaired** **mitophagy flux in cholesterol-enriched cells incubated with CCCP.** Cells were first incubated with a complex of cholesterol:methyl-β-cyclodextrin (CHO:MCD) containing 50 μg/ml cholesterol for 1h followed by 4h of recovery. Then, mitophagy was induced with CCCP (10 μM) for 24 h. **(a)** Dual-excitation ratiometric imaging of control and cholesterol-enriched cells stably expressing mt-mKeima after CCCP exposure. Scale bars: 25 μm. **(b)** Mitophagy index calculated by dividing the pixels from the red area in the intensity scatter plots by the total sum of red and green selection, after subtracting the background. **(c)** Intensity scatter plots. For each condition, all the pixels from the sum projection of green and red channels are represented. Selected red areas are the pixels with a ratio of red/green intensity higher than 1.5. The mitophagy index is expressed as percentage of control (n = 3). One-way ANOVA. **P* < 0.05; ***P* < 0.01.


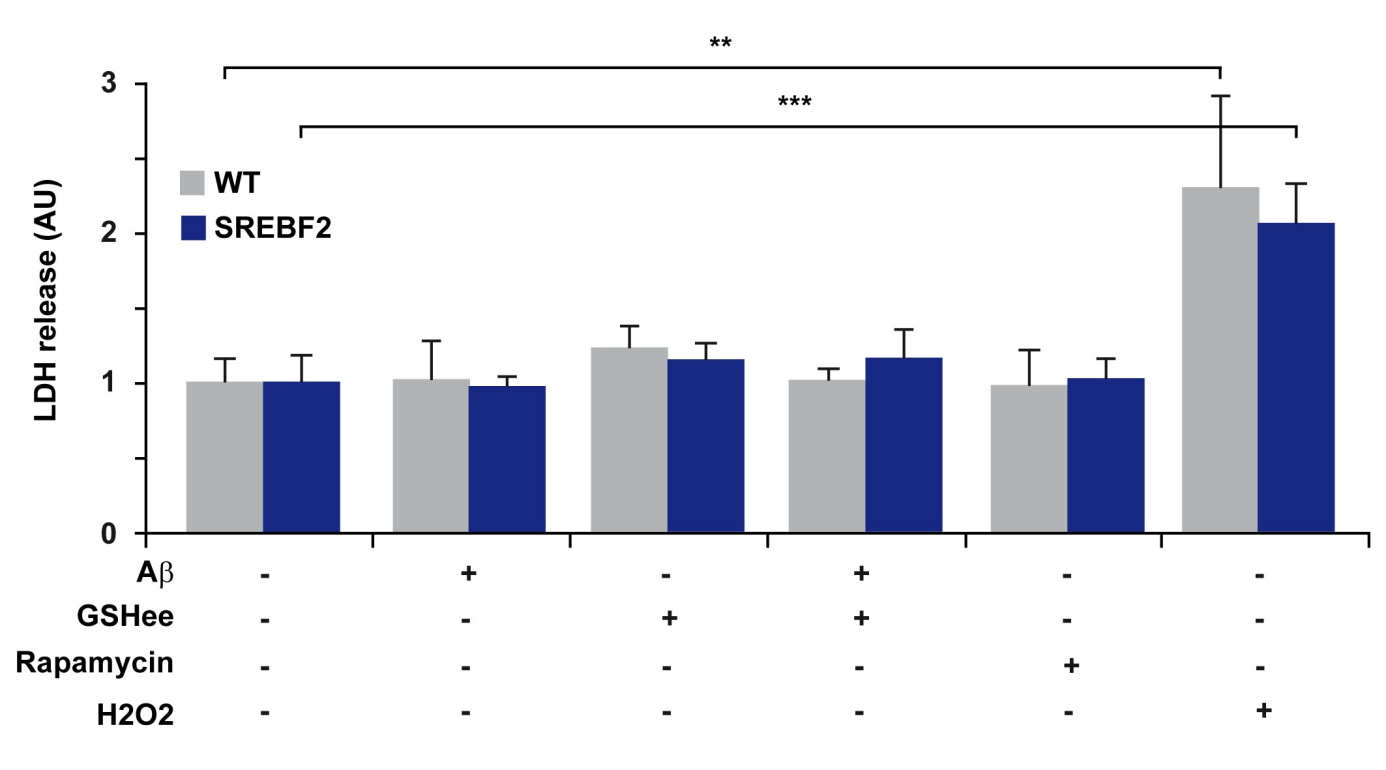


**Figure 4. Cell Viability of WT and SREBF2 neurons was not affected by the treatment with A, rapamycin or GSH ethyl ester (GSHee).** Embryonic cortical and hippocampal neurons isolated from WT and SREBF2 mice were incubated with A (5uM) or rapamycin (10 nM) for 24 h with or without GSHee pre-incubation (0.5 mM, for 30 min). Cytotoxicity of the different compounds was assessed by lactate dehydrogenase (LDH) assay and expressed as % of LDH release. H2O2 (300 M for 24 h) treatment was used as a positive control. Student’s t-test. ***P* < 0.01, ****P* < 0.001 (data are mean ± SD). AU: arbitrary units.


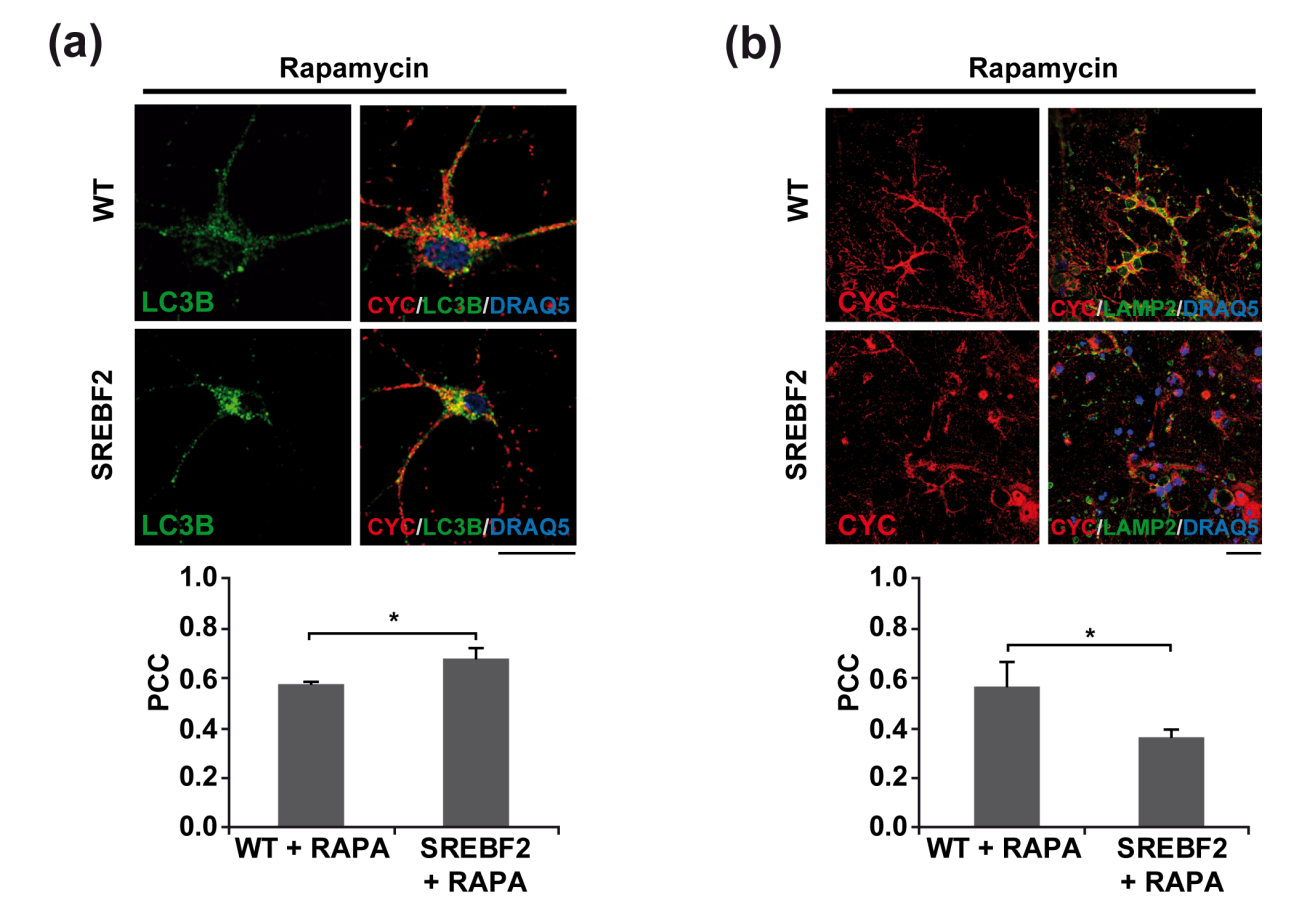


**Figure 5. Defective mitophagy in SREBF2 neurons exposed to rapamycin.** Embryonic cortical and hippocampal neurons isolated from WT and SREBF2 mice were incubated with rapamycin (RAPA, 10 nM) for 24h. **(a)** Shown are representative confocal images of a double immunofluorescence for LC3B (green) and CYC (red). **(b)** Representative confocal images of the immunostaining for LAMP2 (green) and CYC (red). The Pearson’s correlation coefficient (PCC) was used as a measured of colocalization of Alexa fluor 488 (LC3B, LAMP2) with Cy3 (CYC) signals and calculated from 3 independent experiments (at least 3 random fields were analyzed per condition). Scale bars: 25 μm. **P* < 0.05.


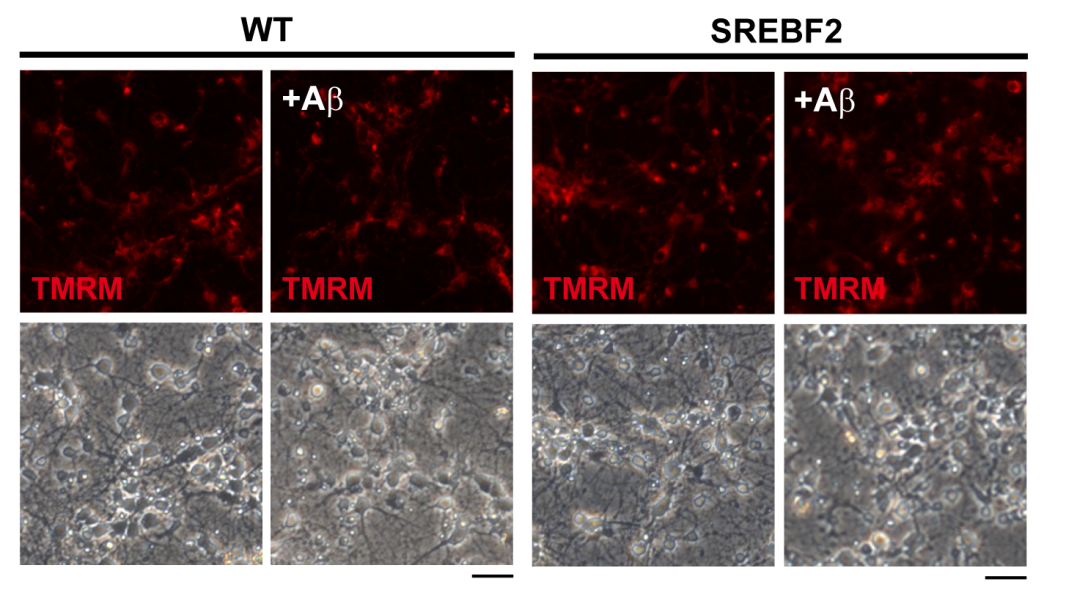


**Figure 6. Mitochondrial membrane potential remains unchanged in cultured primary neurons after A exposure.**  Embryonic cortical/hippocampal neurons isolated from WT and SREBF2 mice were incubated with Aβ (5 μM) for 24 h and stained with TMRM (1 nM) for 30 min. Shown are representative fluorescence microscopy images of TMRM accompanied by the corresponding phase-contrast images (n = 3). Scale bars: 25 μm.


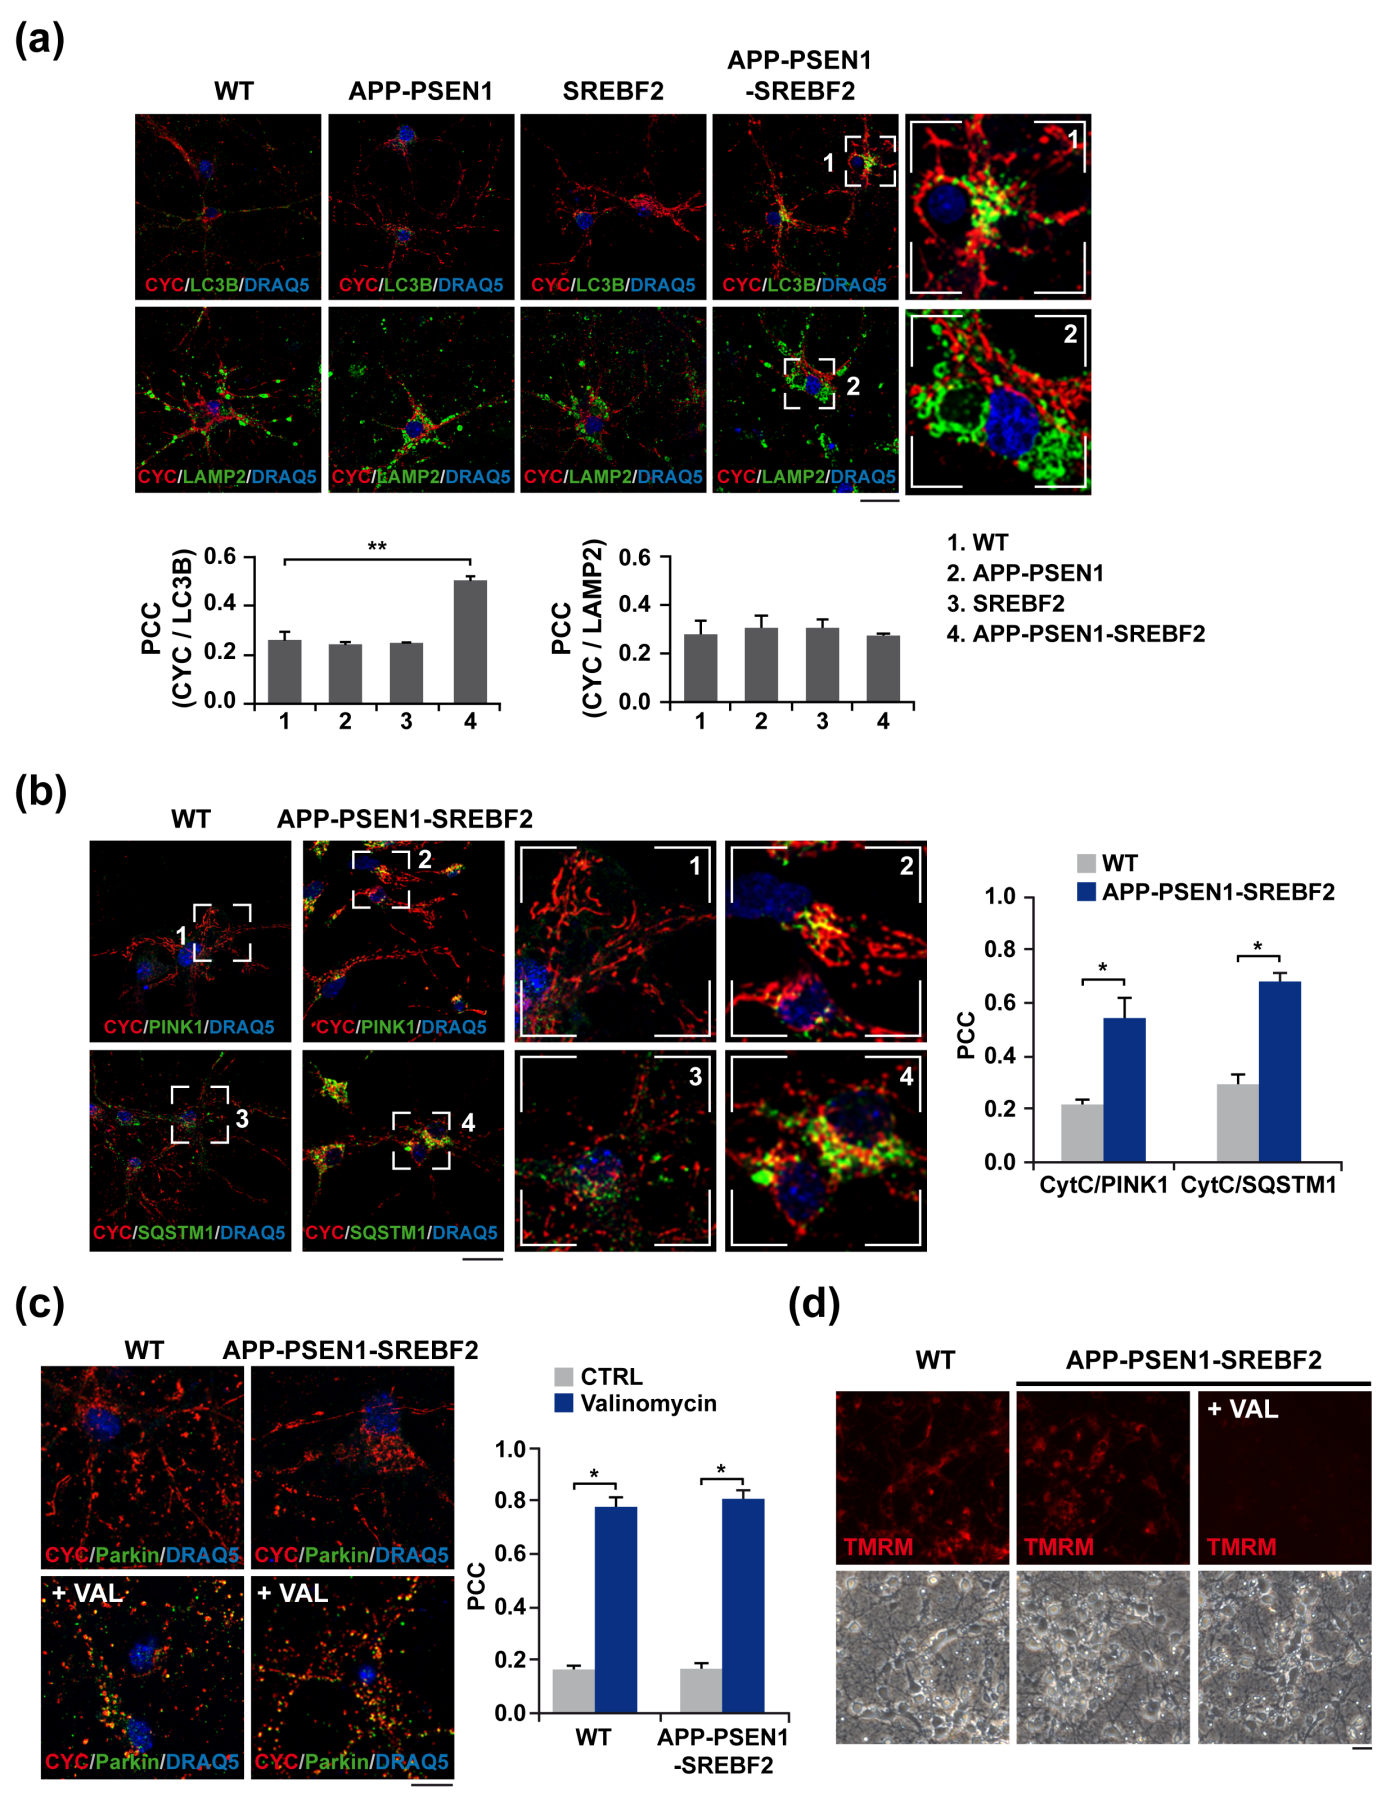


**Figure 7. SREBF2 overexpression in APP-PSEN1 neurons results in an accumulation of mitophagosomes but prevents mitophagy completion.** **(a and b)** Embryonic cortical/hippocampal neurons were isolated from WT (wild-type), SREBF2, APP-PSEN1 and APP-PSEN1-SREBF2 mice. **(a)** Shown are representative confocal images of a double immunofluorescence for LC3B (green) and CYC (red) and for LAMP2 (green) and CYC (red). Scale bar: 25 μm. **(b)** Representative confocal images of double immunostainings for PINK1 (green) and CYC (red) and for SQSTM1 (green) and CYC (red). Scale bar: 25 μm. **(c and d)** Neuronal cultures were incubated with valinomycin (10 μM) for 3 h. **(c)** Shown are representative confocal images of a double immunofluorescence for CYC (red) and parkin (green). Scale bars: 10 μm. **(d)** After valinomycin incubation cells were stained with TMRM (1 nM) for 30 min. Shown are representative fluorescence microscopy images of TMRM accompanied by the corresponding phase-contrast images. Scale bars: 25 μm. Nuclei were counterstained with DRAQ5 (blue). Insets show a 3-fold magnification of the indicated regions. In all the cases, the Pearson’s correlation coefficient (PCC) was calculated from 3 independent experiments (at least 6 random fields were analyzed per condition). **P* < 0.05; ***P* < 0.01 (data are mean ± SD).


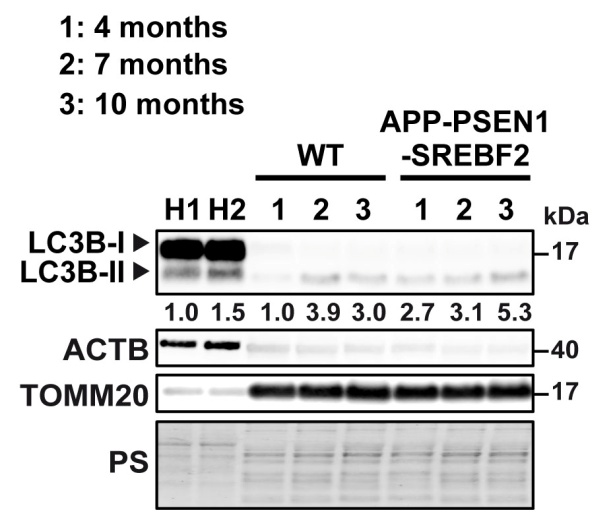


**Figure 8. Immunoblot analysis of LC3B levels in mitochondria isolated from brains of WT and APP-PSEN1-SREBF2 mice from 4, 7, and 10 months of age.** All densitometry values were first normalized to Ponceau S (PS) staining to adjust for protein loading. Then, LC3B-II values were normalized to the values of the corresponding ACTB/actin  (homogenates, H) or TOMM20 (mitochondria) bands. H1: homogenate from 9-month-old WT mouse. H2: homogenate from 9-month-old APP-PSEN1-SREBF2 mouse.

**
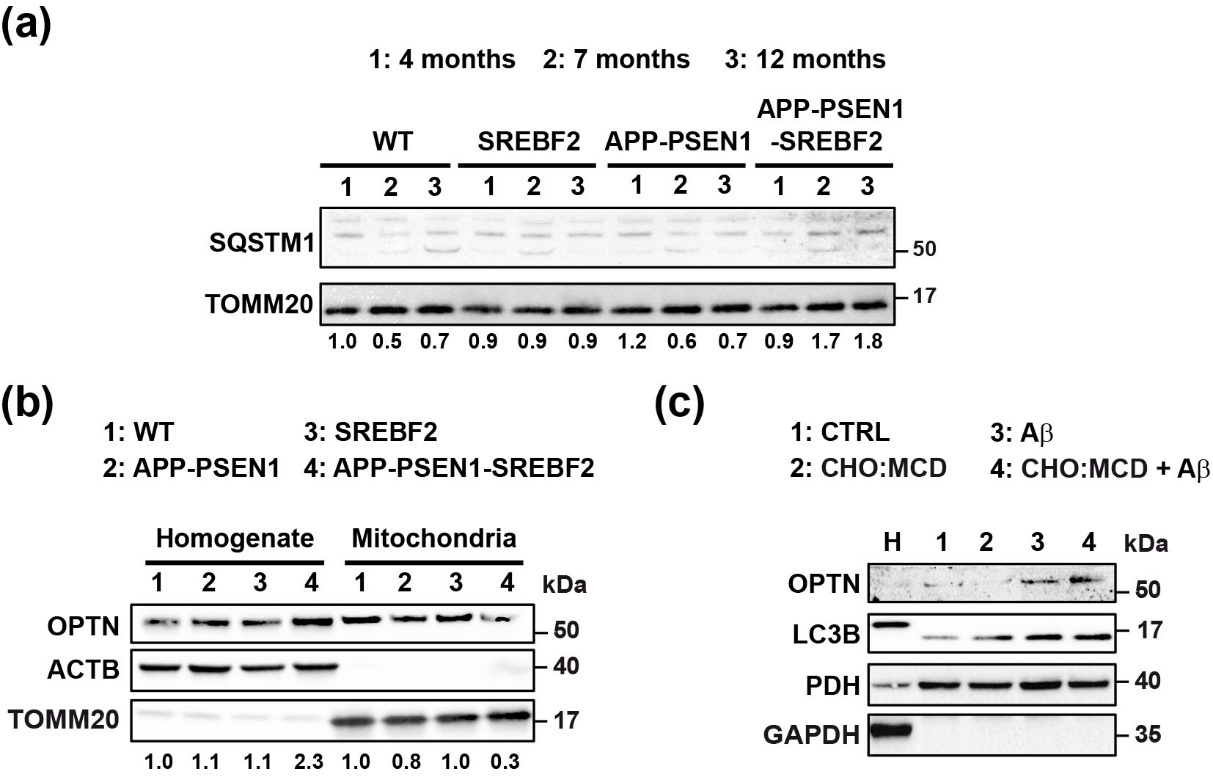
**

**Figure 9. Differential recruitment of autophagy receptors in brains of APP-PSEN1-SREBF2 mice and in cholesterol-enriched SH-SY5Y cells exposed to A. (a)** Western blot analysis of SQSTM1 levels in the mitochondria-rich fraction from brains of WT and the indicated transgenic mice at 4, 7 and 12 month of age. **(b)** Western blot analysis of OPTN in brain homogenates and isolated mitochondria from 8-month-old WT and the indicated transgenic mice. Densitometric values of the SQSTM1 and OPTN bands were normalized to the values of the corresponding ACTB/actin  (homogenates) and TOMM20 (mitochondrial fraction) bands. **(b)** Immunoblot analysis of OPTN and LC3B levels in the mitochondria-rich fraction of SH-SY5Y cells. Cells were incubated with a complex of cholesterol:methyl-β-cyclodextrin (CHO:MCD) containing 50 μg/ml cholesterol during 1 h followed by 4 h of recovery. After cholesterol-enrichment, mitophagy was induced with Aβ (10 μM) for 24h. H: homogenate from control cells. GAPDH and PDH levels were assessed as homogenate and mitochondria markers, respectively.


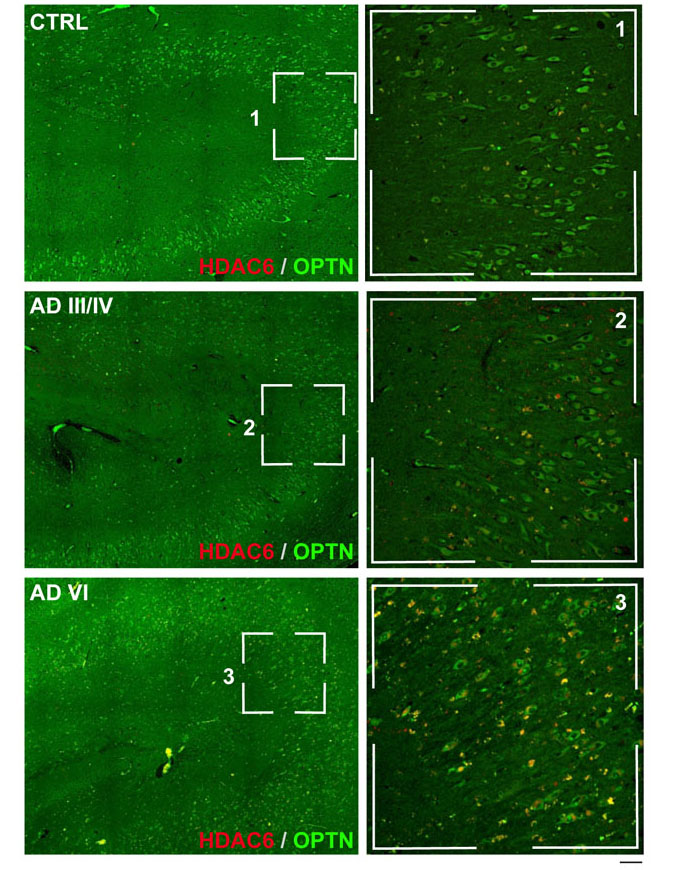


**Figure 10. Appearance of OPTN-positive aggregates in CA3-CA2 hippocampal layers concomitant to the neuropathological AD progression.** Hippocampal slices from control (CTRL) and AD patients classified into three groups according to their neuropathological hallmarks and following the “ABC” score: CTRL, intermediate AD (AD III-IV) and high AD (AD VI). Shown are representative stitched confocal photomicrograph of the hippocampal CA3-CA2 layers with double immunofluorescence for OPTN (green) and HDAC6 (red). Magnifications are sum slices projections of the indicated region. Scale bar: 50 μm.


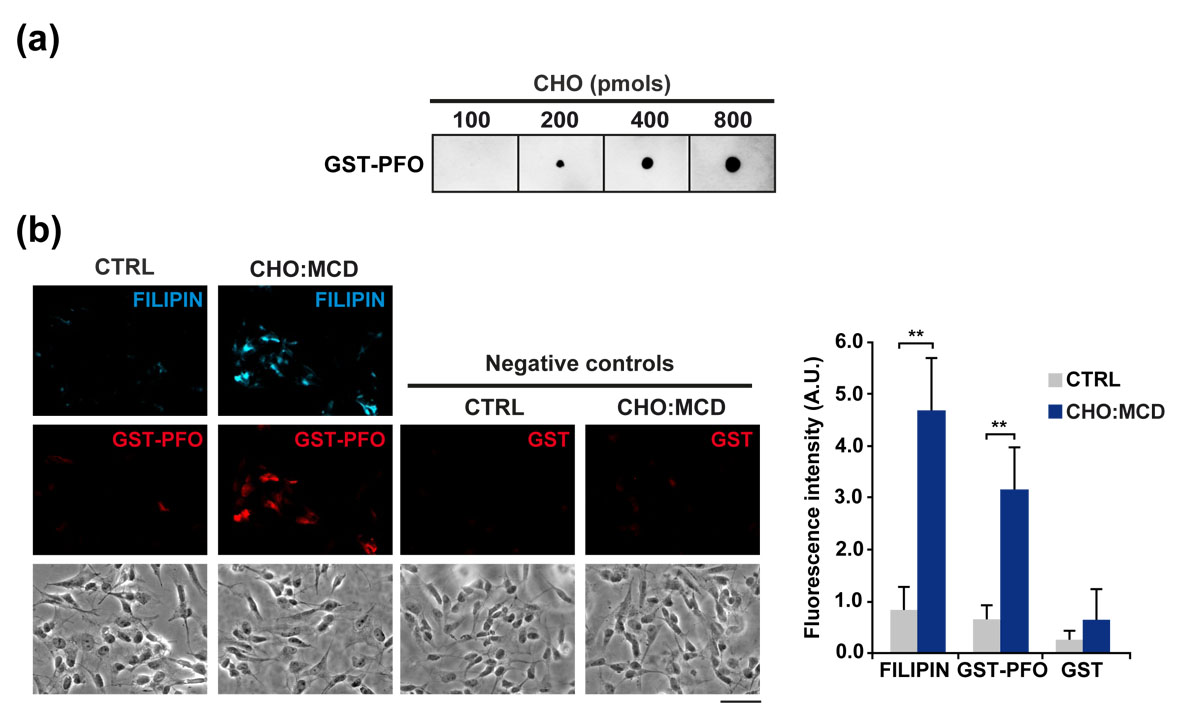


**Figure 11. Selective recognition of cholesterol by GST-PFO. (a)** Protein-lipid overlay assay. Indicated amounts of cholesterol were spotted in a nitrocellulose membrane, incubated with GST-PFO (2 μg/ml) for 1h and immunoblotted. **(b)** SH-SY5Y cells were incubated with a complex of cholesterol:methyl-β-cyclodextrin (CHO:MCD) containing 50 μg/ml cholesterol during 1 h. Then, cells were fixed and incubated with GST-PFO (20 μg/ml) and filipin (0.25 mg/ml) for 45 min. Negative controls without GST-PFO incubation were included. Fluorescence intensity was expressed as the integrated density of the fluorescence signal from each image (n = 3). Scale bar: 50 μm. Student’s t-test. ***P* < 0.01 (data are mean ± SD).


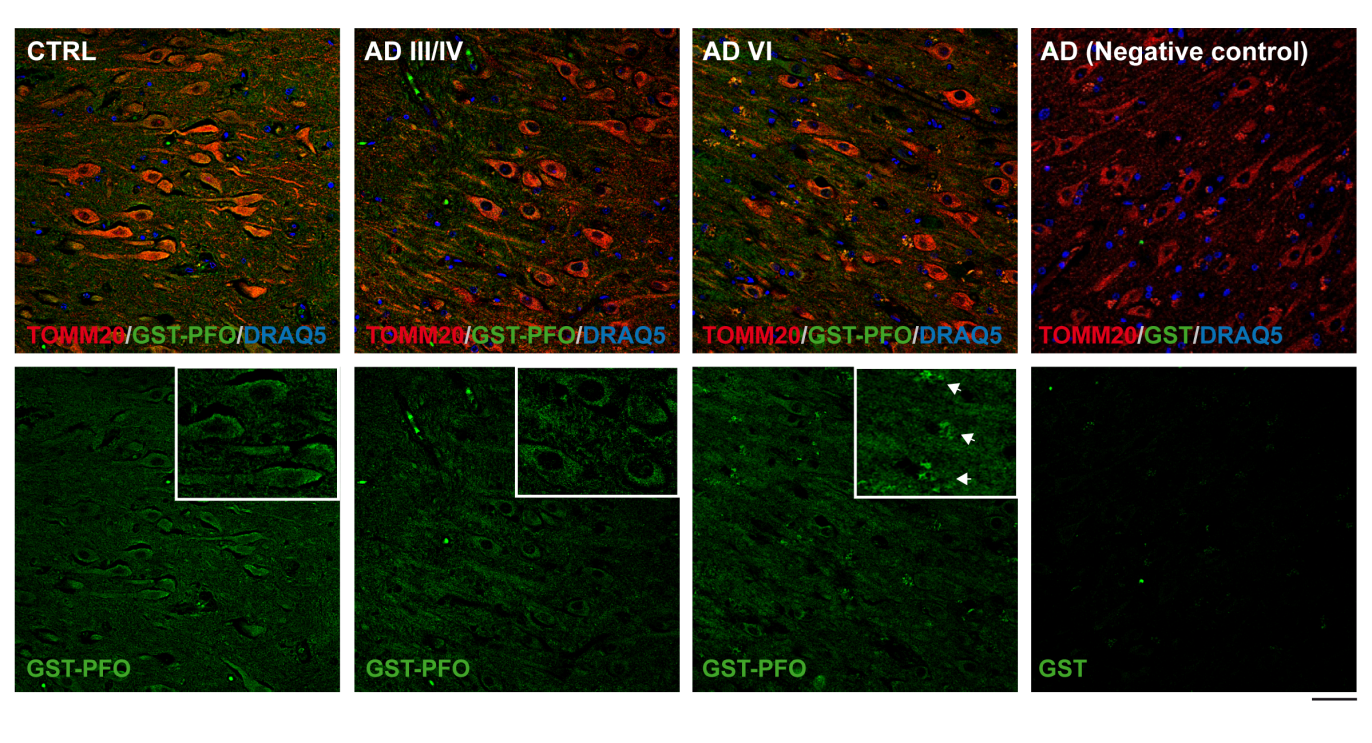


**Figure 12. Differential cholesterol distribution in hippocampal neurons with the progression of neuropathological AD stages.** Hippocampal slices from control (CTRL) subjects and individuals with AD classified into three groups according to their neuropathological hallmarks: CTRL, intermediate AD (AD III-IV) and high AD (AD VI). The sections were incubated with GST-PFO (20 μg/m) for 3 h prior immunolabeling. Shown are representative confocal photomicrograph of double immunofluorescence for GST-PFO (green) and TOMM20 (red). A negative control without GST-PFO incubation was included. Nuclei were counterstained by DRAQ5 (blue). White arrows indicate GST-PFO-immunopositive aggregates. n = 5 individuals per group.Scales bar: 50 μm.


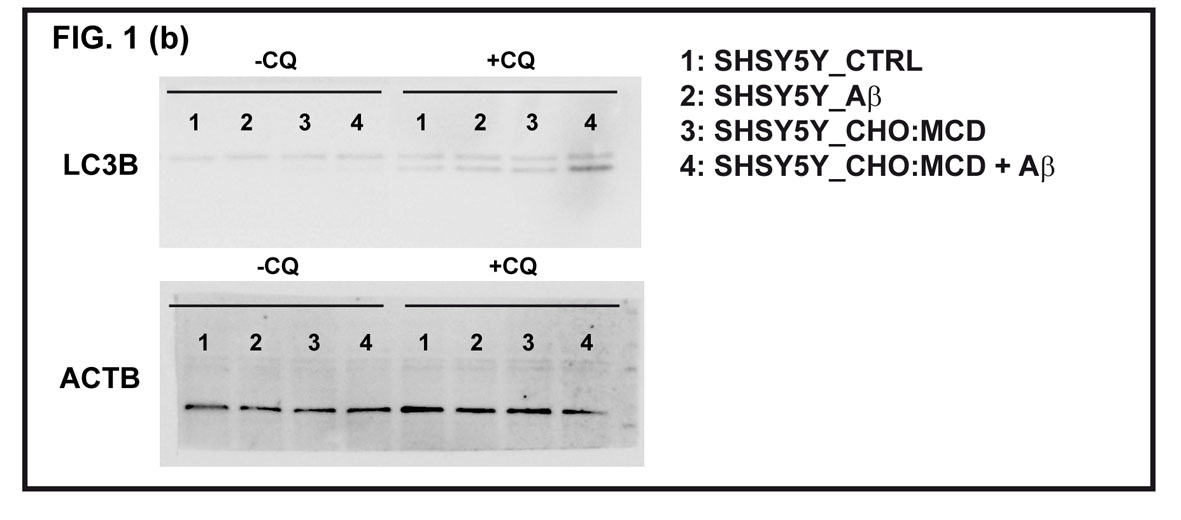


**Figure 13.** Uncropped scans of western blots included in **Figures 1**.


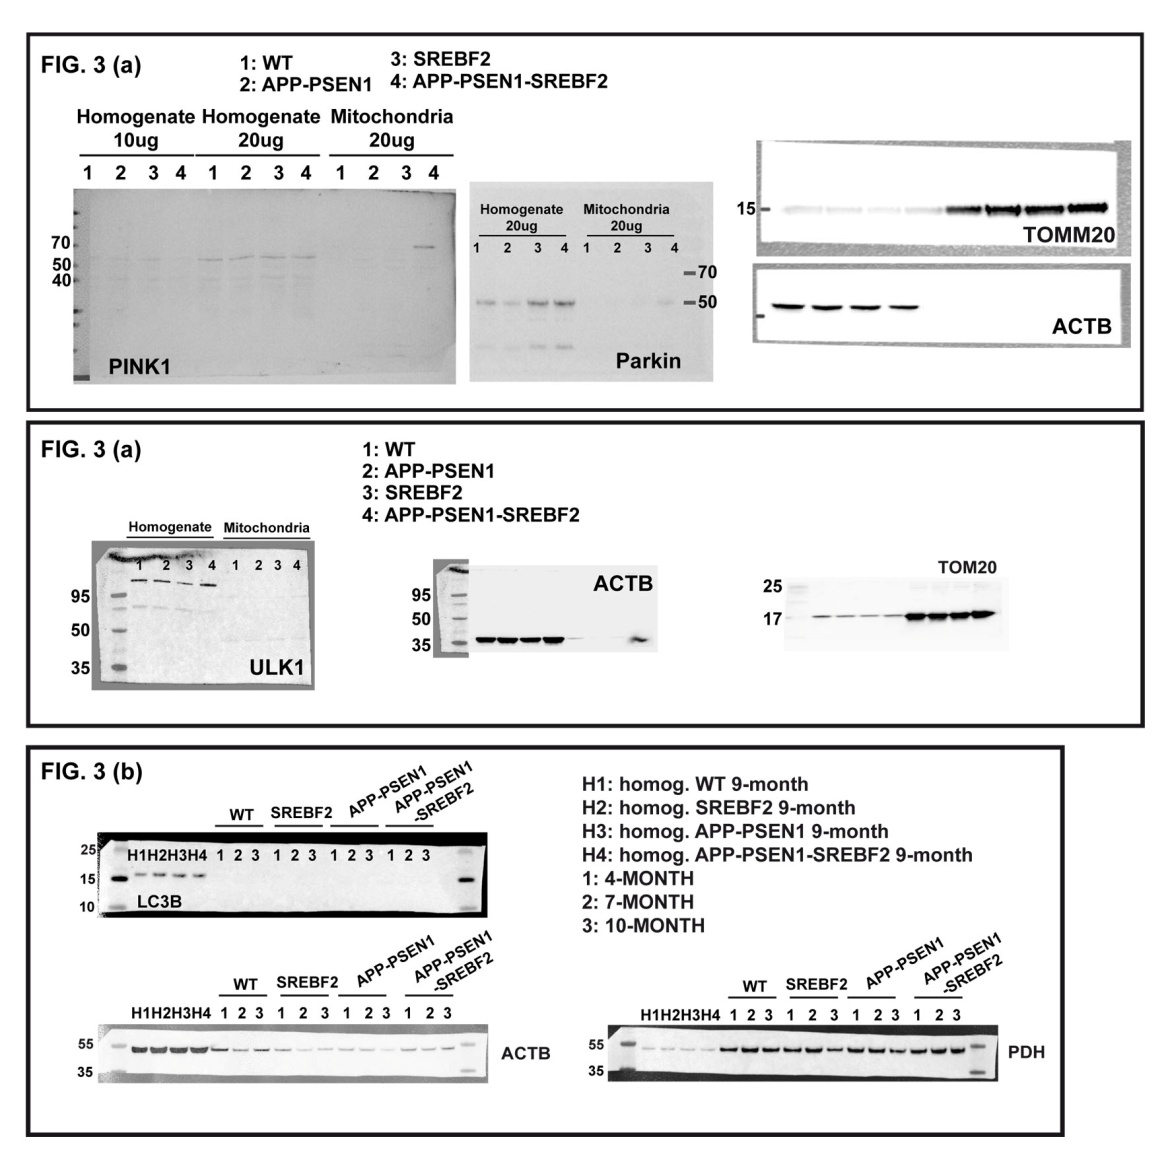
**
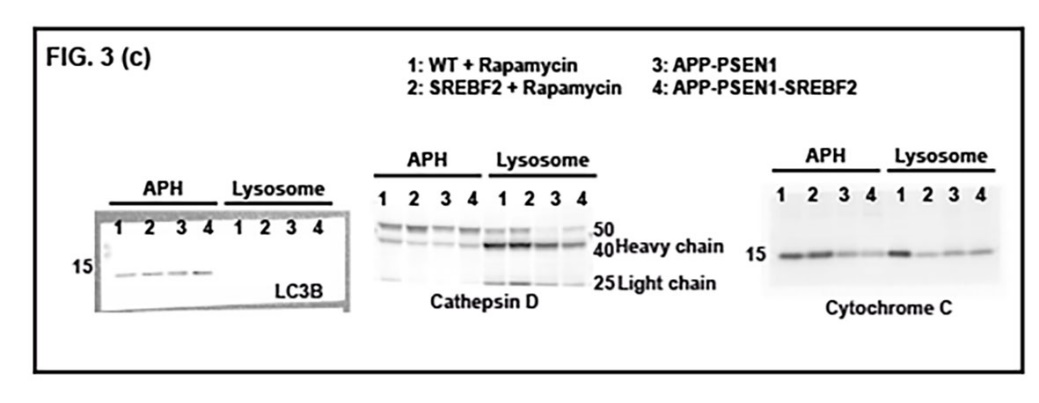
**

**
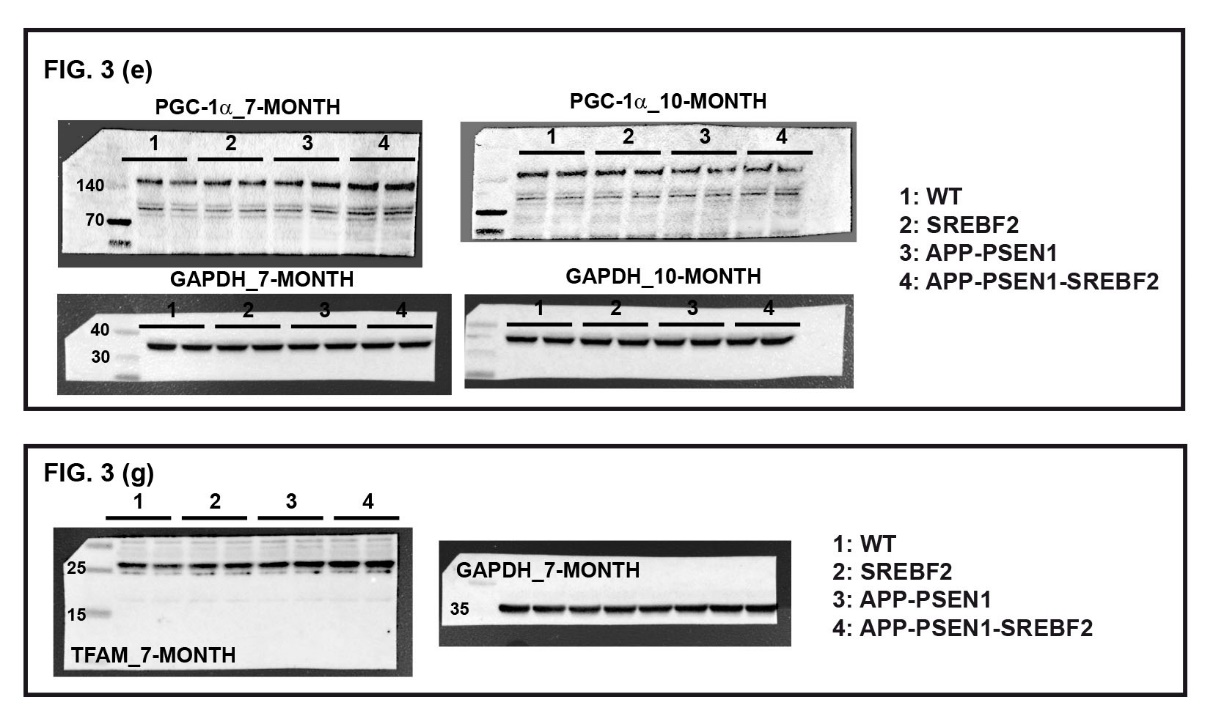
**

**Figure 14.** Uncropped scans of western blots included in **Figures 3**.


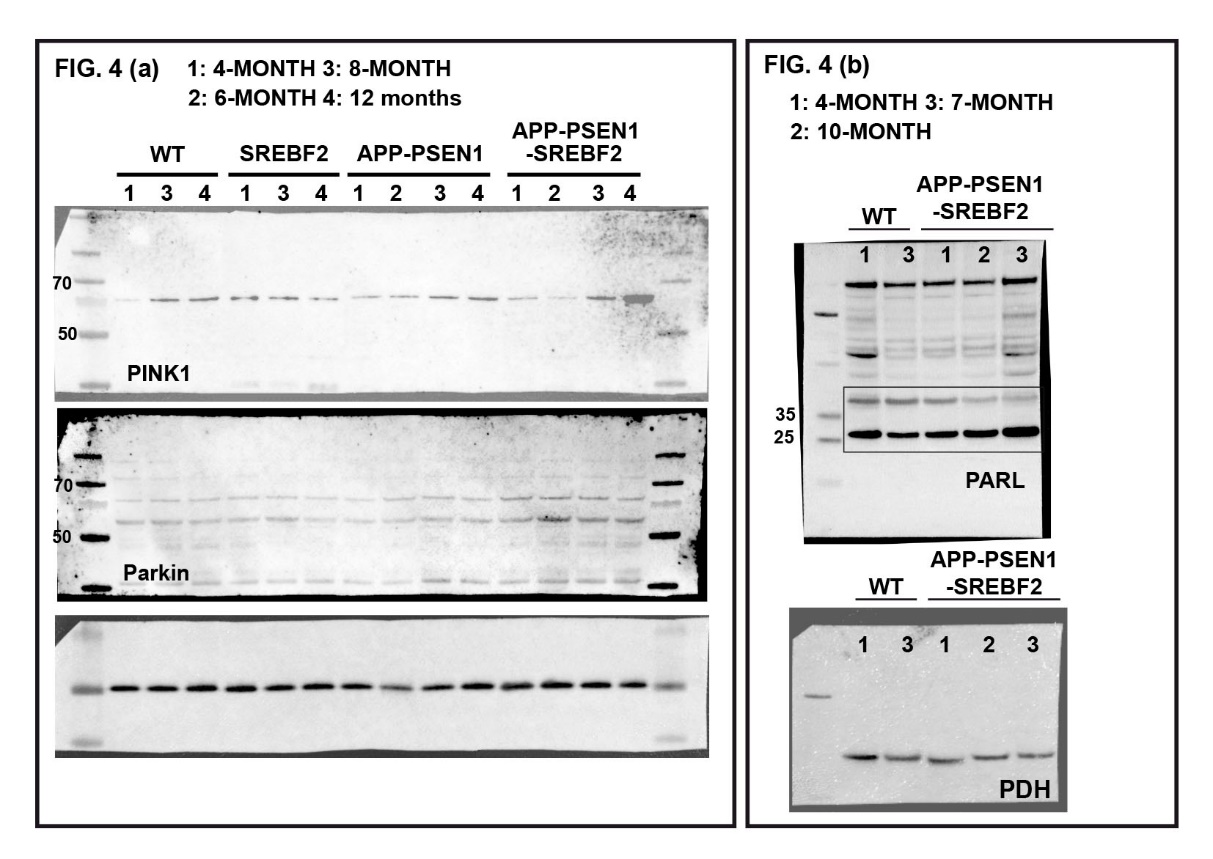


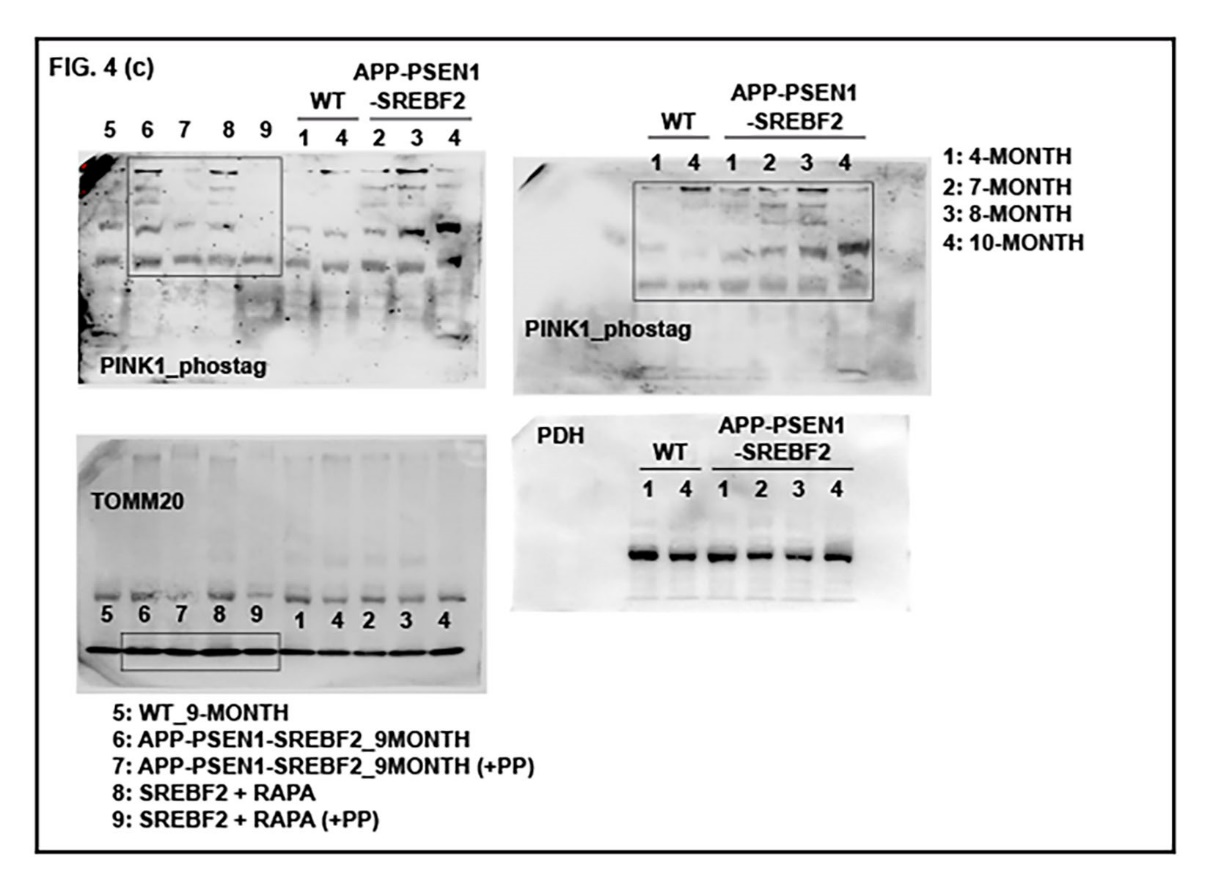


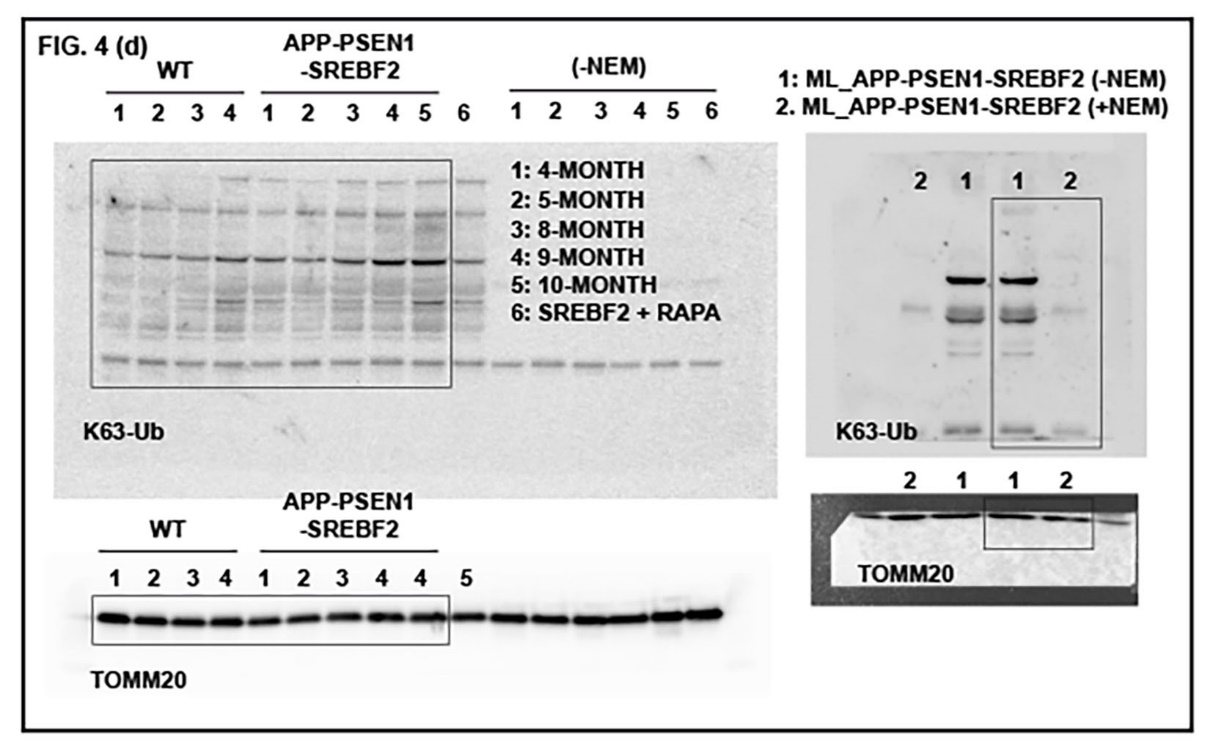


**Figure 15.** Uncropped scans of western blots included in **Figure 4**.


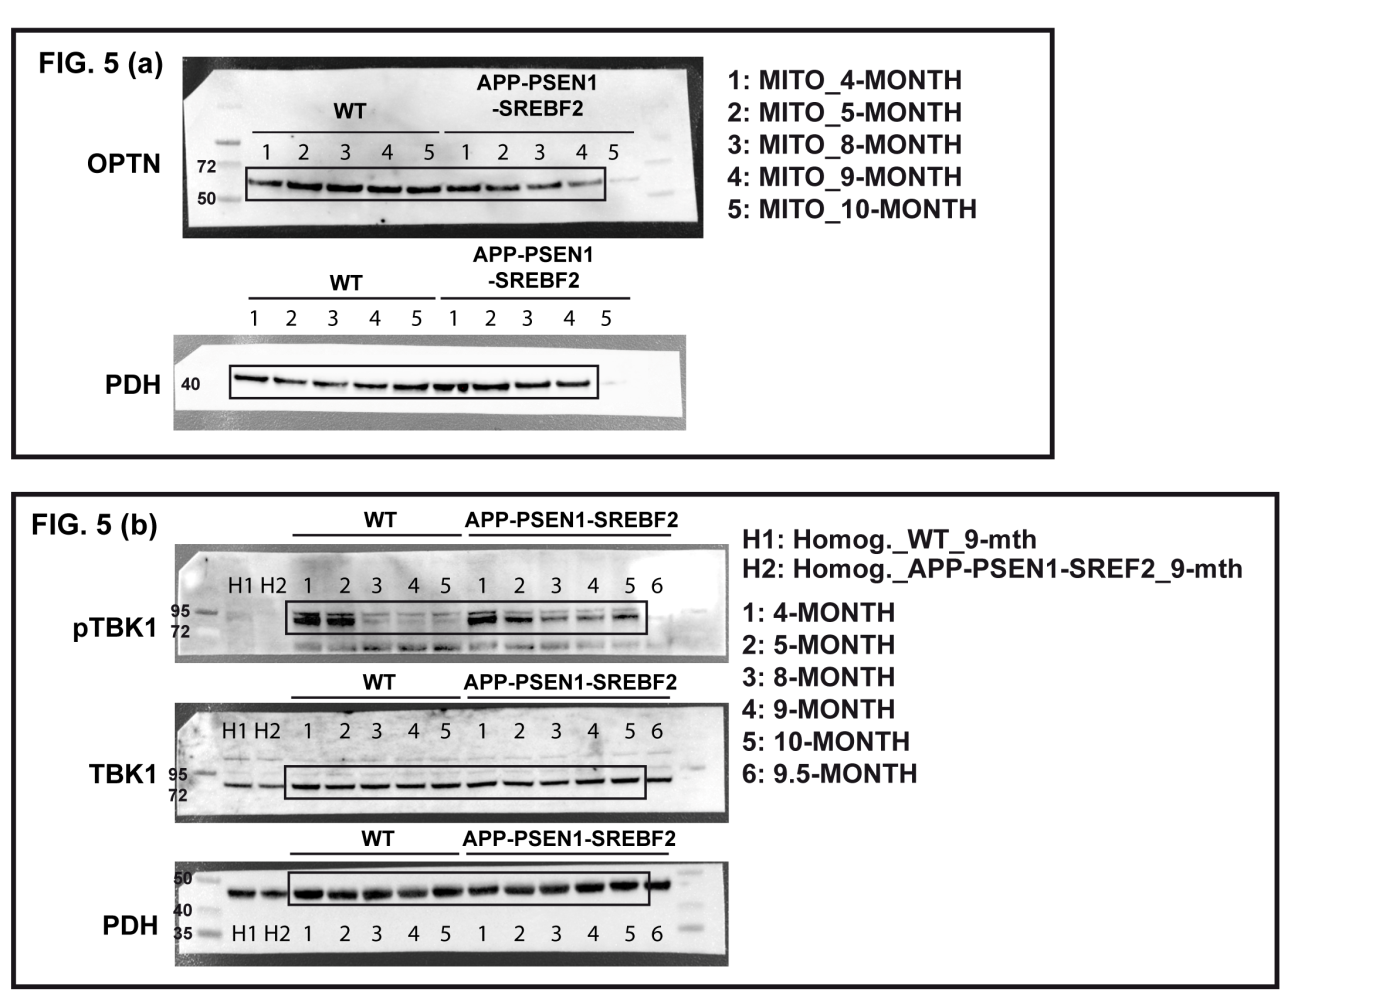


**Figure 16.** Uncropped scans of western blots included in **Figures 5**.
